# Supplementary material for: New estimates of sulfate diffusion rates in the EPICA Dome C ice core
Source: Copernicus journal article supplement (doi:10.5194/cp-20-2031-2024), 2024-09-16
Supplement: Supplementary file 1 [file cp-20-2031-2024-supplement.zip]

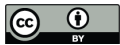

## *Supplement of*

# **New estimates of sulfate diffusion rates in the EPICA Dome C ice core**

**Rachael H. Rhodes et al.**

*Correspondence to:* Rachael H. Rhodes (rhr34@cam.ac.uk)

- cp-20-2031-2024-supplement-title-page.pdf
- RRhodes\_EDCsulfate\_supplement.pdf
- RRhodes\_TableS1\_EDC\_SO4\_diffrates.xlsx

The copyright of individual parts of the supplement might differ from the article licence.
